# Supplementary material
Source: Research Square preprint supplement (doi:10.21203/rs.3.rs-7040692/v1)
Supplement: Supplementary file 1 [file 5c4bba5f93be3df982cb1056.docx]

**Table 1**

**Absolute Number and Age-Adjusted Mortality Rate per Million (95% Confidence Interval) of Breast Cancer Deaths in Males in the United States, 1999-2020**

| **Year** | **Absolute Number** | **AAMR per Million** |
| --- | --- | --- |
| 1999 | 338 | 25.8 (23.0 – 28.6) |
| 2000 | 401 | 30.0 (27.0 – 33.0) |
| 2001 | 386 | 28.5 (25.6 – 31.3) |
| 2002 | 349 | 25.5 (22.8 – 28.2) |
| 2003 | 359 | 26.0 (23.3 – 28.7) |
| 2004 | 341 | 23.9 (21.3 – 26.4) |
| 2005 | 358 | 24.5 (21.9 – 27.0) |
| 2006 | 357 | 24.1 (21.6 – 26.6) |
| 2007 | 364 | 24.1 (21.6 – 26.6) |
| 2008 | 388 | 24.7 (22.2 – 27.2) |
| 2009 | 335 | 21.2 (18.9 – 23.4) |
| 2010 | 421 | 25.8 (23.4 – 28.3) |
| 2011 | 467 | 27.9 (25.3 – 30.4) |
| 2012 | 378 | 21.4 (19.3 – 23.6) |
| 2013 | 420 | 23.2 (20.9 – 25.4) |
| 2014 | 395 | 20.8 (18.7 – 22.9) |
| 2015 | 431 | 21.9 (19.8 – 24.0) |
| 2016 | 422 | 20.7 (18.7 – 22.7) |
| 2017 | 448 | 21.3 (19.3 – 23.3) |
| 2018 | 447 | 20.9 (18.9 – 22.9) |
| 2019 | 455 | 20.4 (18.5 – 22.3) |
| 2020 | 520 | 23.0 (21.0 – 25.0) |
| **Total** | **8780** | **23.5 (23.0 – 24.0)** |

**Table 2**

**Absolute Number and Age-Adjusted Mortality Rate per Million (95% Confidence Interval) of Breast Cancer Deaths in Non-Hispanic Black/African Americans and White Males in the United States, 1999-2020**

|  | **Absolute Number** | | **AAMR per Million** | |
| --- | --- | --- | --- | --- |
| **Year** | **NH Blacks or African Americans** | **NH Whites** | **NH Blacks or African Americans** | **NH Whites** |
| 1999 | 44 | 280 | 46.8 (33.6 – 63.5) | 25.0 (22.0 – 28.0) |
| 2000 | 43 | 343 | 45.3 (32.4 – 61.7) | 30.1 (26.9 – 33.4) |
| 2001 | 40 | 327 | 40.1 (28.2 – 55.2) | 28.5 (25.4 – 31.6) |
| 2002 | 45 | 292 | 43.8 (31.6 – 59.3) | 25.2 (22.2 – 28.1) |
| 2003 | 38 | 312 | 38.4 (26.7 – 53.4) | 26.6 (23.7 – 29.6) |
| 2004 | 37 | 287 | 37.5 (25.9 – 52.3) | 23.8 (21.0 – 26.6) |
| 2005 | 45 | 303 | 39.3 (28.5 – 53.0) | 24.8 (22.0 – 27.6) |
| 2006 | 34 | 308 | 31.2 (21.4 – 44.1) | 24.9 (22.1 – 27.7) |
| 2007 | 41 | 307 | 37.3 (26.6 – 51.0) | 24.4 (21.6 – 27.1) |
| 2008 | 59 | 311 | 49.7 (37.4 – 64.7) | 24.0 (21.4 – 26.7) |
| 2009 | 37 | 279 | 31.9 (22.1 – 44.6) | 21.3 (18.8 – 23.8) |
| 2010 | 52 | 348 | 42.7 (31.6 – 56.5) | 25.9 (23.2 – 28.6) |
| 2011 | 52 | 393 | 42.2 (31.2 – 55.7) | 28.7 (25.9 – 31.6) |
| 2012 | 39 | 326 | 30.7 (21.6 – 42.3) | 22.7 (20.2 – 25.2) |
| 2013 | 50 | 351 | 36.5 (26.8 – 48.6) | 23.9 (21.3 – 26.4) |
| 2014 | 65 | 307 | 41.4 (31.7 – 53.2) | 20.3 (18.0 – 22.6) |
| 2015 | 67 | 335 | 41.4 (31.8 – 53.1) | 21.5 (19.1 – 23.8) |
| 2016 | 51 | 349 | 31.6 (23.2 – 42.1) | 21.4 (19.1 – 23.7) |
| 2017 | 65 | 357 | 40.7 (31.1 – 52.3) | 21.3 (19.1 – 23.6) |
| 2018 | 56 | 360 | 30.7 (22.9 – 40.3) | 21.5 (19.2 – 23.7) |
| 2019 | 65 | 365 | 35.0 (26.7 – 45.0) | 20.9 (18.7 – 23.1) |
| 2020 | 79 | 404 | 41.8 (32.7 – 52.5) | 23.0 (20.8 – 25.3) |
| **Total** | **1104** | **7244** | **38.5 (36.2 – 40.9)** | **23.8 (23.3 – 24.4)** |

**NH=Non-Hispanic**

**Table 3**

**Breast Cancer in Males Age-Adjusted Mortality Rates per Million (95% Confidence Interval) Stratified by Urban and Rural Classification in the United States, 1999 to 2020**

| **Year** | **Urban** | **Rural** |
| --- | --- | --- |
| 1999 | 26.6  (23.4 - 29.8) | 22.5  (17.1 - 29.1) |
| 2000 | 31.2  (27.8 - 34.6) | 25.2  (19.4 - 32.1) |
| 2001 | 30.1  (26.8 - 33.4) | 21.5  (16.2 - 27.9) |
| 2002 | 25.9  (22.8 - 28.9) | 23.7  (18.1 - 30.4) |
| 2003 | 25.5  (22.5 - 28.5) | 28.2  (22.0 - 35.5) |
| 2004 | 25.0  (22.1 - 27.9) | 19.4  (14.4 - 25.5) |
| 2005 | 23.9  (21.1 - 26.7) | 26.9  (21.1 - 33.7) |
| 2006 | 24.0  (21.2 - 26.8) | 24.7  (19.2 - 31.3) |
| 2007 | 24.3  (21.5 - 27.0) | 23.3  (18.0 - 29.8) |
| 2008 | 25.8  (23.0 - 28.6) | 20.2  (15.3 - 26.2) |
| 2009 | 21.7  (19.2 - 24.3) | 18.5  (13.8 - 24.1) |
| 2010 | 26.0  (23.2 - 28.7) | 25.2  (19.9 - 31.6) |
| 2011 | 27.4  (24.6 - 30.2) | 29.9  (24.0 - 36.8) |
| 2012 | 21.9  (19.4 - 24.3) | 19.7  (15.2 - 25.2) |
| 2013 | 23.2  (20.7 - 25.7) | 23.0  (18.0 - 28.8) |
| 2014 | 20.9  (18.6 - 23.2) | 20.4  (15.9 - 25.9) |
| 2015 | 21.8  (19.5 - 24.2) | 21.8  (17.2 - 27.3) |
| 2016 | 20.0  (17.8 - 22.2) | 24.1  (19.2 - 29.8) |
| 2017 | 21.8  (19.5 - 24.0) | 19.0  (14.8 - 24.1) |
| 2018 | 21.0  (18.9 - 23.2) | 20.1  (15.8 - 25.2) |
| 2019 | 20.8  (18.7 - 22.9) | 18.1  (14.1 - 22.9) |
| 2020 | 22.4  (20.2 - 24.6) | 25.9  (20.8 - 31.1) |
| **Total** | **23.8**  **(23.2 - 24.3)** | **22.7**  **(21.5 - 23.8)** |

**Table 4**

**Census Region-Level Breast Cancer in Males Age-Adjusted Mortality Rates per Million (95% Confidence Interval) People in the United States, 1999 to 2020**

| **Census Region** | **AAMR per Million** |
| --- | --- |
| Northeast | 28.2 (27.0 - 29.4) |
| Midwest | 25.3 (24.3 - 26.4) |
| South | 22.4 (21.6 - 23.2) |
| West | 19.4 (18.4 - 20.3) |
| **Total** | **23.5 (23.0 - 24.0)** |

**Table 5**

**State-Level Breast Cancer in Males Age-Adjusted Mortality Rates per Million (95% Confidence Interval) People in the United States, 1999 to 2020**

| **States** | **AAMR per Million in descending order** |
| --- | --- |
| Rhode Island | 38.1 (28.6 - 49.7) |
| New Jersey | 33.7 (30.2 - 37.2) |
| Vermont | 31.2 (20.2 - 46.1) |
| Maryland | 30.7 (26.4 - 35.0) |
| Georgia | 30.2 (26.5 - 33.9) |
| Connecticut | 29.5 (24.6 - 34.4) |
| Montana | 28.9 (20.5 - 39.5) |
| Nebraska | 28.9 (22.4 - 36.6) |
| Ohio | 28.0 (25.3 - 30.8) |
| Pennsylvania | 27.5 (25.0 - 29.9) |
| Maine | 27.3 (20.3 - 35.9) |
| Michigan | 27.2 (24.3 - 30.0) |
| Indiana | 26.8 (23.0 - 30.5) |
| New York | 26.7 (24.6 - 28.7) |
| Louisiana | 26.4 (21.9 - 31.0) |
| Wisconsin | 26.3 (22.6 - 30.1) |
| Arkansas | 26.0 (20.0 - 33.1) |
| West Virginia | 26.0 (20.0 - 33.1) |
| Massachusetts | 25.9 (22.4 - 29.3) |
| Virginia | 25.0 (21.6 - 28.4) |
| Illinois | 24.4 (21.8 - 26.9) |
| North Carolina | 24.4 (21.4 - 27.5) |
| Washington | 24.3 (20.8 - 27.7) |
| South Dakota | 24.2 (16.0 - 35.3) |
| Mississippi | 23.8 (18.7 - 29.9) |
| Tennessee | 23.5 (19.8 - 27.1) |
| Kansas | 23.3  (18.6 - 28.8) |
| South Carolina | 23.1  (19.0 - 27.2) |
| Iowa | 22.9  (18.6 - 27.9) |
| Oklahoma | 22.7  (18.2 - 27.1) |
| Missouri | 22.4  (19.0 - 25.8) |
| Nevada | 22.1  (16.9 - 28.3) |
| New Hampshire | 22  (15.3 - 30.6) |
| Kentucky | 21.3  (17.2 - 25.4) |
| Alabama | 21.2  (17.3 - 25.1) |
| Idaho | 21.2  (15.1 - 29.0) |
| Minnesota | 21.1  (17.6 - 24.7) |
| Delaware | 20.7  (13.1 - 31.1) |
| Oregon | 20.6  (16.7 - 24.6) |
| Colorado | 20.5  (16.5 - 24.5) |
| New Mexico | 20.4  (15.2 - 26.8) |
| Florida | 19.2  (17.7 - 20.7) |
| California | 18.6  (17.3 - 19.9) |
| Texas | 18.1  (16.3 - 19.8) |
| Arizona | 16.6  (13.8 - 19.3) |
| Utah | 14.2  (9.7 - 19.9) |
| Hawaii | 13.6  (8.9 - 20.0) |
